# Supplementary material
Source: PubMed Central journal article supplement (PMC3001505)
Supplement: 092048_4.pdf [file 092048_4.pdf]

**Appendix 4: Individual physicians and health care providers who provided expert review or assisted in preparing implementation tools**

Susan K. Bowles

Kristen Christie

Terri Fergus

Inese Grava-Gubins

Diane Gwartz

Beth Halperin

Alexandra Henteleff

Lane Hersich

David J. Kenny

Cheryl McIntyre

Lori Palozzi

Barry Power

Neil Schechter

Judith Surridge

Carl L. von Baeyer

Lisa Votta Bleeker

Gary A. Walco

William T. Zempsky
